# Supplementary material for: Assessing the risk of concurrent mycoplasma pneumoniae pneumonia in children with tracheobronchial tuberculosis: retrospective study
Source: PeerJ. 2024 Mar 26;12:e17164. doi: 10.7717/peerj.17164 (PMC10979740; doi:10.7717/peerj.17164)
Supplement: Supplemental Information 3 [file peerj-12-17164-s003.xlsx]

## Sheet: Sheet 1
Model	Probability Threshold	False Positive Rate	False Negative Rate	True Positive Rate	True Negative Rate	Net Profit Rate
Xgboost	0	1	0	1	0	0.801887
Xgboost	0.01	1	0	1	0	0.799886
Xgboost	0.02	1	0	1	0	0.797844
Xgboost	0.03	1	0	1	0	0.79576
Xgboost	0.04	1	0	1	0	0.793632
Xgboost	0.05	1	0	1	0	0.79146
Xgboost	0.06	1	0	1	0	0.789241
Xgboost	0.07	1	0	1	0	0.786975
Xgboost	0.08	1	0	1	0	0.78466
Xgboost	0.09	0.0238095	0.0235294	0.976471	0.97619	0.782552
Xgboost	0.1	0.0238095	0.0235294	0.976471	0.97619	0.782495
Xgboost	0.11	0.0238095	0.0235294	0.976471	0.97619	0.782436
Xgboost	0.12	0.0238095	0.0235294	0.976471	0.97619	0.782376
Xgboost	0.13	0.0238095	0.0235294	0.976471	0.97619	0.782314
Xgboost	0.14	0.0238095	0.0235294	0.976471	0.97619	0.782251
Xgboost	0.15	0.0238095	0.0235294	0.976471	0.97619	0.782186
Xgboost	0.16	0.0238095	0.0235294	0.976471	0.97619	0.78212
Xgboost	0.17	0.0238095	0.0235294	0.976471	0.97619	0.782053
Xgboost	0.18	0.0238095	0.0235294	0.976471	0.97619	0.781983
Xgboost	0.19	0.0238095	0.0235294	0.976471	0.97619	0.781912
Xgboost	0.2	0.0238095	0.0235294	0.976471	0.97619	0.78184
Xgboost	0.21	0.0238095	0.0235294	0.976471	0.97619	0.781765
Xgboost	0.22	0.0238095	0.0235294	0.976471	0.97619	0.781688
Xgboost	0.23	0.0238095	0.0235294	0.976471	0.97619	0.78161
Xgboost	0.24	0.0238095	0.0235294	0.976471	0.97619	0.781529
Xgboost	0.25	0.0238095	0.0235294	0.976471	0.97619	0.781447
Xgboost	0.26	0.0238095	0.0235294	0.976471	0.97619	0.781362
Xgboost	0.27	0.0238095	0.0235294	0.976471	0.97619	0.781274
Xgboost	0.28	0.0238095	0.0235294	0.976471	0.97619	0.781184
Xgboost	0.29	0.0238095	0.0235294	0.976471	0.97619	0.781092
Xgboost	0.3	0.0238095	0.0235294	0.976471	0.97619	0.780997
Xgboost	0.31	0.0238095	0.0235294	0.976471	0.97619	0.7809
Xgboost	0.32	0.0238095	0.0235294	0.976471	0.97619	0.780799
Xgboost	0.33	0.0238095	0.0235294	0.976471	0.97619	0.780696
Xgboost	0.34	0.0238095	0.0235294	0.976471	0.97619	0.780589
Xgboost	0.35	0.0238095	0.0235294	0.976471	0.97619	0.780479
Xgboost	0.36	0.0238095	0.0235294	0.976471	0.97619	0.780366
Xgboost	0.37	0.0238095	0.0235294	0.976471	0.97619	0.780249
Xgboost	0.38	0.0238095	0.0235294	0.976471	0.97619	0.780128
Xgboost	0.39	0.0238095	0.0235294	0.976471	0.97619	0.780003
Xgboost	0.4	0.0238095	0.0235294	0.976471	0.97619	0.779874
Xgboost	0.41	0.0238095	0.0235294	0.976471	0.97619	0.779741
Xgboost	0.42	0.0238095	0.0235294	0.976471	0.97619	0.779603
Xgboost	0.43	0.0238095	0.0235294	0.976471	0.97619	0.77946
Xgboost	0.44	0.0238095	0.0235294	0.976471	0.97619	0.779313
Xgboost	0.45	0.0238095	0.0235294	0.976471	0.97619	0.77916
Xgboost	0.46	0.0238095	0.0235294	0.976471	0.97619	0.779001
Xgboost	0.47	0.0238095	0.0235294	0.976471	0.97619	0.778836
Xgboost	0.48	0.0238095	0.0235294	0.976471	0.97619	0.778665
Xgboost	0.49	0.0238095	0.0235294	0.976471	0.97619	0.778487
Xgboost	0.5	0.0238095	0.0235294	0.976471	0.97619	0.778302
Xgboost	0.51	0.0238095	0.0235294	0.976471	0.97619	0.778109
Xgboost	0.52	0.0238095	0.0235294	0.976471	0.97619	0.777909
Xgboost	0.53	0.0238095	0.0235294	0.976471	0.97619	0.7777
Xgboost	0.54	0.0238095	0.0235294	0.976471	0.97619	0.777482
Xgboost	0.55	0.0238095	0.0235294	0.976471	0.97619	0.777254
Xgboost	0.56	0.0238095	0.0235294	0.976471	0.97619	0.777015
Xgboost	0.57	0.0238095	0.0235294	0.976471	0.97619	0.776766
Xgboost	0.58	0.0238095	0.0235294	0.976471	0.97619	0.776505
Xgboost	0.59	0.0238095	0.0235294	0.976471	0.97619	0.776231
Xgboost	0.6	0.0238095	0.0235294	0.976471	0.97619	0.775943
Xgboost	0.61	0.0238095	0.0235294	0.976471	0.97619	0.775641
Xgboost	0.62	0.0238095	0.0235294	0.976471	0.97619	0.775323
Xgboost	0.63	0.0238095	0.0235294	0.976471	0.97619	0.774987
Xgboost	0.64	0.0238095	0.0235294	0.976471	0.97619	0.774633
Xgboost	0.65	0.0238095	0.0235294	0.976471	0.97619	0.774259
Xgboost	0.66	0.0238095	0.0235294	0.976471	0.97619	0.773862
Xgboost	0.67	0.0238095	0.0235294	0.976471	0.97619	0.773442
Xgboost	0.68	0.0238095	0.0235294	0.976471	0.97619	0.772995
Xgboost	0.69	0.0238095	0.0235294	0.976471	0.97619	0.77252
Xgboost	0.7	0.0238095	0.0235294	0.976471	0.97619	0.772013
Xgboost	0.71	0.0238095	0.0235294	0.976471	0.97619	0.77147
Xgboost	0.72	0.0238095	0.0235294	0.976471	0.97619	0.770889
Xgboost	0.73	0.0238095	0.0235294	0.976471	0.97619	0.770266
Xgboost	0.74	0.0238095	0.0235294	0.976471	0.97619	0.769594
Xgboost	0.75	0.0238095	0.0235294	0.976471	0.97619	0.768868
Xgboost	0.76	0.0238095	0.0235294	0.976471	0.97619	0.768082
Xgboost	0.77	0.0238095	0.0235294	0.976471	0.97619	0.767227
Xgboost	0.78	0.0238095	0.0235294	0.976471	0.97619	0.766295
Xgboost	0.79	0.0238095	0.0235294	0.976471	0.97619	0.765274
Xgboost	0.8	0.0238095	0.0235294	0.976471	0.97619	0.764151
Xgboost	0.81	0.0238095	0.0235294	0.976471	0.97619	0.76291
Xgboost	0.82	0.0238095	0.0235294	0.976471	0.97619	0.76153
Xgboost	0.83	0.0238095	0.0235294	0.976471	0.97619	0.759989
Xgboost	0.84	0.0238095	0.0235294	0.976471	0.97619	0.758255
Xgboost	0.85	0.0238095	0.0235294	0.976471	0.97619	0.756289
Xgboost	0.86	0.0238095	0.0235294	0.976471	0.97619	0.754043
Xgboost	0.87	0.0238095	0.0235294	0.976471	0.97619	0.751451
Xgboost	0.88	0.0238095	0.0235294	0.976471	0.97619	0.748428
Xgboost	0.89	0.0238095	0.0235294	0.976471	0.97619	0.744854
Xgboost	0.9	0.0238095	0.0235294	0.976471	0.97619	0.740566
Xgboost	0.91	0.0238095	0.0235294	0.976471	0.97619	0.735325
Xgboost	0.92	0.0238095	0.0235294	0.976471	0.97619	0.728774
Xgboost	0.93	0.0238095	0.0235294	0.976471	0.97619	0.72035
Xgboost	0.94	0.0238095	0.0235294	0.976471	0.97619	0.709119
Xgboost	0.95	0.0238095	0.0235294	0.976471	0.97619	0.693396
Xgboost	0.96	0.0238095	0.0235294	0.976471	0.97619	0.669811
Xgboost	0.97	0.0238095	0.0235294	0.976471	0.97619	0.630503
Xgboost	0.98	0.0238095	0.0235294	0.976471	0.97619	0.551887
Xgboost	0.99	0.0238095	0.0235294	0.976471	0.97619	0.316038
Xgboost	1	0	1	0	1	#NUM!
lasso	0	1	0	1	0	0.801887
lasso	0.01	1	0	1	0	0.799886
lasso	0.02	1	0	1	0	0.797844
lasso	0.03	1	0	1	0	0.79576
lasso	0.04	1	0	1	0	0.793632
lasso	0.05	1	0	1	0	0.79146
lasso	0.06	1	0	1	0	0.789241
lasso	0.07	1	0	1	0	0.786975
lasso	0.08	1	0	1	0	0.78466
lasso	0.09	1	0	1	0	0.782293
lasso	0.1	1	0	1	0	0.779874
lasso	0.11	1	0	1	0	0.777401
lasso	0.12	1	0	1	0	0.774871
lasso	0.13	1	0	1	0	0.772284
lasso	0.14	1	0	1	0	0.769636
lasso	0.15	1	0	1	0	0.766926
lasso	0.16	1	0	1	0	0.764151
lasso	0.17	1	0	1	0	0.761309
lasso	0.18	1	0	1	0	0.758399
lasso	0.19	1	0	1	0	0.755416
lasso	0.2	1	0	1	0	0.752358
lasso	0.21	1	0	1	0	0.749224
lasso	0.22	1	0	1	0	0.746009
lasso	0.23	1	0	1	0	0.74271
lasso	0.24	1	0	1	0	0.739325
lasso	0.25	1	0	1	0	0.735849
lasso	0.26	1	0	1	0	0.732279
lasso	0.27	1	0	1	0	0.728612
lasso	0.28	1	0	1	0	0.724843
lasso	0.29	1	0	1	0	0.720967
lasso	0.3	0.047619	0.1	0.9	0.952381	0.717655
lasso	0.31	0.047619	0.1	0.9	0.952381	0.71746
lasso	0.32	0.047619	0.1	0.9	0.952381	0.717259
lasso	0.33	0.047619	0.1	0.9	0.952381	0.717052
lasso	0.34	0.047619	0.1	0.9	0.952381	0.716838
lasso	0.35	0.047619	0.1	0.9	0.952381	0.716618
lasso	0.36	0.047619	0.1	0.9	0.952381	0.716392
lasso	0.37	0.047619	0.1	0.9	0.952381	0.716158
lasso	0.38	0.047619	0.1	0.9	0.952381	0.715916
lasso	0.39	0.047619	0.1	0.9	0.952381	0.715667
lasso	0.4	0.047619	0.1	0.9	0.952381	0.715409
lasso	0.41	0.047619	0.1	0.9	0.952381	0.715142
lasso	0.42	0.047619	0.1	0.9	0.952381	0.714867
lasso	0.43	0.047619	0.1	0.9	0.952381	0.714581
lasso	0.44	0.047619	0.1	0.9	0.952381	0.714286
lasso	0.45	0.047619	0.1	0.9	0.952381	0.713979
lasso	0.46	0.047619	0.1	0.9	0.952381	0.713662
lasso	0.47	0.047619	0.1	0.9	0.952381	0.713332
lasso	0.48	0.047619	0.1	0.9	0.952381	0.71299
lasso	0.49	0.047619	0.1	0.9	0.952381	0.712634
lasso	0.5	0.047619	0.1	0.9	0.952381	0.712264
lasso	0.51	0.047619	0.1	0.9	0.952381	0.711879
lasso	0.52	0.047619	0.1	0.9	0.952381	0.711478
lasso	0.53	0.047619	0.1	0.9	0.952381	0.71106
lasso	0.54	0.047619	0.1	0.9	0.952381	0.710623
lasso	0.55	0.047619	0.1	0.9	0.952381	0.710168
lasso	0.56	0.047619	0.1	0.9	0.952381	0.709691
lasso	0.57	0.047619	0.1	0.9	0.952381	0.709193
lasso	0.58	0.047619	0.1	0.9	0.952381	0.70867
lasso	0.59	0.047619	0.1	0.9	0.952381	0.708122
lasso	0.6	0.047619	0.1	0.9	0.952381	0.707547
lasso	0.61	0.047619	0.1	0.9	0.952381	0.706942
lasso	0.62	0.047619	0.1	0.9	0.952381	0.706306
lasso	0.63	0.047619	0.1	0.9	0.952381	0.705635
lasso	0.64	0.047619	0.1	0.9	0.952381	0.704927
lasso	0.65	0.047619	0.1	0.9	0.952381	0.704178
lasso	0.66	0.047619	0.1	0.9	0.952381	0.703385
lasso	0.67	0.047619	0.1	0.9	0.952381	0.702544
lasso	0.68	0.047619	0.1	0.9	0.952381	0.701651
lasso	0.69	0.047619	0.1	0.9	0.952381	0.7007
lasso	0.7	0.047619	0.1	0.9	0.952381	0.699686
lasso	0.71	0.047619	0.1	0.9	0.952381	0.698601
lasso	0.72	0.047619	0.1	0.9	0.952381	0.697439
lasso	0.73	0.047619	0.1	0.9	0.952381	0.696191
lasso	0.74	0.047619	0.1	0.9	0.952381	0.694848
lasso	0.75	0.047619	0.1	0.9	0.952381	0.693396
lasso	0.76	0.047619	0.1	0.9	0.952381	0.691824
lasso	0.77	0.047619	0.1	0.9	0.952381	0.690115
lasso	0.78	0.047619	0.1	0.9	0.952381	0.68825
lasso	0.79	0.047619	0.1	0.9	0.952381	0.686208
lasso	0.8	0.047619	0.1	0.9	0.952381	0.683962
lasso	0.81	0.047619	0.1	0.9	0.952381	0.68148
lasso	0.82	0.047619	0.1	0.9	0.952381	0.678721
lasso	0.83	0.047619	0.1	0.9	0.952381	0.675638
lasso	0.84	0.047619	0.1	0.9	0.952381	0.67217
lasso	0.85	0.047619	0.1	0.9	0.952381	0.668239
lasso	0.86	0.047619	0.1	0.9	0.952381	0.663747
lasso	0.87	0.047619	0.1	0.9	0.952381	0.658563
lasso	0.88	0.047619	0.1	0.9	0.952381	0.652516
lasso	0.89	0.047619	0.1	0.9	0.952381	0.645369
lasso	0.9	0.047619	0.1	0.9	0.952381	0.636792
lasso	0.91	0.047619	0.1	0.9	0.952381	0.62631
lasso	0.92	0.047619	0.1	0.9	0.952381	0.613208
lasso	0.93	0.047619	0.1	0.9	0.952381	0.596361
lasso	0.94	0.047619	0.1	0.9	0.952381	0.573899
lasso	0.95	0.047619	0.1	0.9	0.952381	0.542453
lasso	0.96	0.047619	0.1	0.9	0.952381	0.495283
lasso	0.97	0.047619	0.1	0.9	0.952381	0.416667
lasso	0.98	0.047619	0.1	0.9	0.952381	0.259434
lasso	0.99	0	1	0	1	0
lasso	1	0	1	0	1	#NUM!
Decision tree	0	1	0	1	0	0.801887
Decision tree	0.01	1	0	1	0	0.799886
Decision tree	0.02	1	0	1	0	0.797844
Decision tree	0.03	1	0	1	0	0.79576
Decision tree	0.04	1	0	1	0	0.793632
Decision tree	0.05	1	0	1	0	0.79146
Decision tree	0.06	1	0	1	0	0.789241
Decision tree	0.07	1	0	1	0	0.786975
Decision tree	0.08	1	0	1	0	0.78466
Decision tree	0.09	1	0	1	0	0.782293
Decision tree	0.1	1	0	1	0	0.779874
Decision tree	0.11	1	0	1	0	0.777401
Decision tree	0.12	1	0	1	0	0.774871
Decision tree	0.13	1	0	1	0	0.772284
Decision tree	0.14	1	0	1	0	0.769636
Decision tree	0.15	1	0	1	0	0.766926
Decision tree	0.16	1	0	1	0	0.764151
Decision tree	0.17	1	0	1	0	0.761309
Decision tree	0.18	1	0	1	0	0.758399
Decision tree	0.19	1	0	1	0	0.755416
Decision tree	0.2	1	0	1	0	0.752358
Decision tree	0.21	1	0	1	0	0.749224
Decision tree	0.22	1	0	1	0	0.746009
Decision tree	0.23	1	0	1	0	0.74271
Decision tree	0.24	1	0	1	0	0.739325
Decision tree	0.25	1	0	1	0	0.735849
Decision tree	0.26	0.047619	0.0823529	0.917647	0.952381	0.732534
Decision tree	0.27	0.047619	0.0823529	0.917647	0.952381	0.73236
Decision tree	0.28	0.047619	0.0823529	0.917647	0.952381	0.73218
Decision tree	0.29	0.047619	0.0823529	0.917647	0.952381	0.731996
Decision tree	0.3	0.047619	0.0823529	0.917647	0.952381	0.731806
Decision tree	0.31	0.047619	0.0823529	0.917647	0.952381	0.731611
Decision tree	0.32	0.047619	0.0823529	0.917647	0.952381	0.73141
Decision tree	0.33	0.047619	0.0823529	0.917647	0.952381	0.731202
Decision tree	0.34	0.047619	0.0823529	0.917647	0.952381	0.730989
Decision tree	0.35	0.047619	0.0823529	0.917647	0.952381	0.730769
Decision tree	0.36	0.047619	0.0823529	0.917647	0.952381	0.730542
Decision tree	0.37	0.047619	0.0823529	0.917647	0.952381	0.730308
Decision tree	0.38	0.047619	0.0823529	0.917647	0.952381	0.730067
Decision tree	0.39	0.047619	0.0823529	0.917647	0.952381	0.729818
Decision tree	0.4	0.047619	0.0823529	0.917647	0.952381	0.72956
Decision tree	0.41	0.047619	0.0823529	0.917647	0.952381	0.729293
Decision tree	0.42	0.047619	0.0823529	0.917647	0.952381	0.729018
Decision tree	0.43	0.047619	0.0823529	0.917647	0.952381	0.728732
Decision tree	0.44	0.047619	0.0823529	0.917647	0.952381	0.728437
Decision tree	0.45	0.047619	0.0823529	0.917647	0.952381	0.72813
Decision tree	0.46	0.047619	0.0823529	0.917647	0.952381	0.727813
Decision tree	0.47	0.047619	0.0823529	0.917647	0.952381	0.727483
Decision tree	0.48	0.047619	0.0823529	0.917647	0.952381	0.727141
Decision tree	0.49	0.047619	0.0823529	0.917647	0.952381	0.726785
Decision tree	0.5	0.047619	0.0823529	0.917647	0.952381	0.726415
Decision tree	0.51	0.047619	0.0823529	0.917647	0.952381	0.72603
Decision tree	0.52	0.047619	0.0823529	0.917647	0.952381	0.725629
Decision tree	0.53	0.047619	0.0823529	0.917647	0.952381	0.725211
Decision tree	0.54	0.047619	0.0823529	0.917647	0.952381	0.724774
Decision tree	0.55	0.047619	0.0823529	0.917647	0.952381	0.724319
Decision tree	0.56	0.047619	0.0823529	0.917647	0.952381	0.723842
Decision tree	0.57	0.047619	0.0823529	0.917647	0.952381	0.723344
Decision tree	0.58	0.047619	0.0823529	0.917647	0.952381	0.722821
Decision tree	0.59	0.047619	0.0823529	0.917647	0.952381	0.722273
Decision tree	0.6	0.047619	0.0823529	0.917647	0.952381	0.721698
Decision tree	0.61	0.047619	0.0823529	0.917647	0.952381	0.721093
Decision tree	0.62	0.047619	0.0823529	0.917647	0.952381	0.720457
Decision tree	0.63	0.047619	0.0823529	0.917647	0.952381	0.719786
Decision tree	0.64	0.047619	0.0823529	0.917647	0.952381	0.719078
Decision tree	0.65	0.047619	0.0823529	0.917647	0.952381	0.718329
Decision tree	0.66	0.047619	0.0823529	0.917647	0.952381	0.717536
Decision tree	0.67	0.047619	0.0823529	0.917647	0.952381	0.716695
Decision tree	0.68	0.047619	0.0823529	0.917647	0.952381	0.715802
Decision tree	0.69	0.047619	0.0823529	0.917647	0.952381	0.714851
Decision tree	0.7	0.047619	0.0823529	0.917647	0.952381	0.713836
Decision tree	0.71	0.047619	0.0823529	0.917647	0.952381	0.712752
Decision tree	0.72	0.047619	0.0823529	0.917647	0.952381	0.71159
Decision tree	0.73	0.047619	0.0823529	0.917647	0.952381	0.710342
Decision tree	0.74	0.047619	0.0823529	0.917647	0.952381	0.708999
Decision tree	0.75	0.047619	0.0823529	0.917647	0.952381	0.707547
Decision tree	0.76	0.047619	0.0823529	0.917647	0.952381	0.705975
Decision tree	0.77	0.047619	0.0823529	0.917647	0.952381	0.704266
Decision tree	0.78	0.047619	0.0823529	0.917647	0.952381	0.702401
Decision tree	0.79	0.047619	0.0823529	0.917647	0.952381	0.700359
Decision tree	0.8	0.047619	0.0823529	0.917647	0.952381	0.698113
Decision tree	0.81	0.047619	0.0823529	0.917647	0.952381	0.695631
Decision tree	0.82	0.047619	0.0823529	0.917647	0.952381	0.692872
Decision tree	0.83	0.047619	0.0823529	0.917647	0.952381	0.689789
Decision tree	0.84	0.047619	0.0823529	0.917647	0.952381	0.686321
Decision tree	0.85	0.047619	0.0823529	0.917647	0.952381	0.68239
Decision tree	0.86	0.047619	0.0823529	0.917647	0.952381	0.677898
Decision tree	0.87	0.047619	0.0823529	0.917647	0.952381	0.672714
Decision tree	0.88	0.047619	0.0823529	0.917647	0.952381	0.666667
Decision tree	0.89	0.047619	0.0823529	0.917647	0.952381	0.65952
Decision tree	0.9	0.047619	0.0823529	0.917647	0.952381	0.650943
Decision tree	0.91	0.047619	0.0823529	0.917647	0.952381	0.640461
Decision tree	0.92	0.047619	0.0823529	0.917647	0.952381	0.627358
Decision tree	0.93	0.047619	0.0823529	0.917647	0.952381	0.610512
Decision tree	0.94	0.047619	0.0823529	0.917647	0.952381	0.58805
Decision tree	0.95	0.047619	0.0823529	0.917647	0.952381	0.556604
Decision tree	0.96	0.047619	0.0823529	0.917647	0.952381	0.509434
Decision tree	0.97	0.047619	0.0823529	0.917647	0.952381	0.430818
Decision tree	0.98	0.047619	0.0823529	0.917647	0.952381	0.273585
Decision tree	0.99	0	1	0	1	0
Decision tree	1	0	1	0	1	#NUM!
logistics	0	1	0	1	0	0.801887
logistics	0.01	1	0	1	0	0.799886
logistics	0.02	1	0	1	0	0.797844
logistics	0.03	1	0	1	0	0.79576
logistics	0.04	1	0	1	0	0.793632
logistics	0.05	1	0	1	0	0.79146
logistics	0.06	1	0	1	0	0.789241
logistics	0.07	1	0	1	0	0.786975
logistics	0.08	1	0	1	0	0.78466
logistics	0.09	1	0	1	0	0.782293
logistics	0.1	1	0	1	0	0.779874
logistics	0.11	1	0	1	0	0.777401
logistics	0.12	1	0	1	0	0.774871
logistics	0.13	1	0	1	0	0.772284
logistics	0.14	1	0	1	0	0.769636
logistics	0.15	1	0	1	0	0.766926
logistics	0.16	1	0	1	0	0.764151
logistics	0.17	1	0	1	0	0.761309
logistics	0.18	1	0	1	0	0.758399
logistics	0.19	1	0	1	0	0.755416
logistics	0.2	1	0	1	0	0.752358
logistics	0.21	1	0	1	0	0.749224
logistics	0.22	1	0	1	0	0.746009
logistics	0.23	1	0	1	0	0.74271
logistics	0.24	1	0	1	0	0.739325
logistics	0.25	1	0	1	0	0.735849
logistics	0.26	1	0	1	0	0.732279
logistics	0.27	1	0	1	0	0.728612
logistics	0.28	1	0	1	0	0.724843
logistics	0.29	1	0	1	0	0.720967
logistics	0.3	1	0	1	0	0.716981
logistics	0.31	1	0	1	0	0.712879
logistics	0.32	1	0	1	0	0.708657
logistics	0.33	1	0	1	0	0.704309
logistics	0.34	1	0	1	0	0.699828
logistics	0.35	1	0	1	0	0.69521
logistics	0.36	1	0	1	0	0.690448
logistics	0.37	1	0	1	0	0.685535
logistics	0.38	0.166667	0.123529	0.876471	0.833333	0.682593
logistics	0.39	0.166667	0.123529	0.876471	0.833333	0.68172
logistics	0.4	0.166667	0.123529	0.876471	0.833333	0.680818
logistics	0.41	0.166667	0.123529	0.876471	0.833333	0.679885
logistics	0.42	0.166667	0.123529	0.876471	0.833333	0.67892
logistics	0.43	0.166667	0.123529	0.876471	0.833333	0.677921
logistics	0.44	0.166667	0.123529	0.876471	0.833333	0.676887
logistics	0.45	0.166667	0.123529	0.876471	0.833333	0.675815
logistics	0.46	0.166667	0.123529	0.876471	0.833333	0.674703
logistics	0.47	0.166667	0.123529	0.876471	0.833333	0.673549
logistics	0.48	0.166667	0.123529	0.876471	0.833333	0.672351
logistics	0.49	0.166667	0.123529	0.876471	0.833333	0.671106
logistics	0.5	0.166667	0.123529	0.876471	0.833333	0.669811
logistics	0.51	0.166667	0.123529	0.876471	0.833333	0.668464
logistics	0.52	0.166667	0.123529	0.876471	0.833333	0.66706
logistics	0.53	0.166667	0.123529	0.876471	0.833333	0.665596
logistics	0.54	0.166667	0.123529	0.876471	0.833333	0.664069
logistics	0.55	0.166667	0.123529	0.876471	0.833333	0.662474
logistics	0.56	0.166667	0.123529	0.876471	0.833333	0.660806
logistics	0.57	0.166667	0.123529	0.876471	0.833333	0.659061
logistics	0.58	0.166667	0.123529	0.876471	0.833333	0.657233
logistics	0.59	0.166667	0.123529	0.876471	0.833333	0.655315
logistics	0.6	0.166667	0.123529	0.876471	0.833333	0.653302
logistics	0.61	0.166667	0.123529	0.876471	0.833333	0.651185
logistics	0.62	0.166667	0.123529	0.876471	0.833333	0.648957
logistics	0.63	0.166667	0.123529	0.876471	0.833333	0.646609
logistics	0.64	0.166667	0.123529	0.876471	0.833333	0.64413
logistics	0.65	0.166667	0.123529	0.876471	0.833333	0.641509
logistics	0.66	0.166667	0.123529	0.876471	0.833333	0.638735
logistics	0.67	0.166667	0.123529	0.876471	0.833333	0.635792
logistics	0.68	0.166667	0.123529	0.876471	0.833333	0.632665
logistics	0.69	0.166667	0.123529	0.876471	0.833333	0.629337
logistics	0.7	0.166667	0.123529	0.876471	0.833333	0.625786
logistics	0.71	0.166667	0.123529	0.876471	0.833333	0.621991
logistics	0.72	0.166667	0.123529	0.876471	0.833333	0.617925
logistics	0.73	0.166667	0.123529	0.876471	0.833333	0.613557
logistics	0.74	0.166667	0.123529	0.876471	0.833333	0.608853
logistics	0.75	0.166667	0.123529	0.876471	0.833333	0.603774
logistics	0.76	0.166667	0.123529	0.876471	0.833333	0.59827
logistics	0.77	0.166667	0.123529	0.876471	0.833333	0.592289
logistics	0.78	0.166667	0.123529	0.876471	0.833333	0.585763
logistics	0.79	0.166667	0.123529	0.876471	0.833333	0.578616
logistics	0.8	0.166667	0.123529	0.876471	0.833333	0.570755
logistics	0.81	0.166667	0.123529	0.876471	0.833333	0.562066
logistics	0.82	0.166667	0.123529	0.876471	0.833333	0.552411
logistics	0.83	0.166667	0.123529	0.876471	0.833333	0.54162
logistics	0.84	0.166667	0.123529	0.876471	0.833333	0.529481
logistics	0.85	0.166667	0.123529	0.876471	0.833333	0.515723
logistics	0.86	0.166667	0.123529	0.876471	0.833333	0.5
logistics	0.87	0.166667	0.123529	0.876471	0.833333	0.481858
logistics	0.88	0.166667	0.123529	0.876471	0.833333	0.460692
logistics	0.89	0.166667	0.123529	0.876471	0.833333	0.435678
logistics	0.9	0.166667	0.123529	0.876471	0.833333	0.40566
logistics	0.91	0.166667	0.123529	0.876471	0.833333	0.368973
logistics	0.92	0.166667	0.123529	0.876471	0.833333	0.323113
logistics	0.93	0.166667	0.123529	0.876471	0.833333	0.264151
logistics	0.94	0.166667	0.123529	0.876471	0.833333	0.185535
logistics	0.95	0.166667	0.123529	0.876471	0.833333	0.0754717
logistics	0.96	0	1	0	1	0
logistics	0.97	0	1	0	1	0
logistics	0.98	0	1	0	1	0
logistics	0.99	0	1	0	1	0
logistics	1	0	1	0	1	#NUM!
All	0	1	0	1	0	0.801887
All	0.01	1	0	1	0	0.799886
All	0.02	1	0	1	0	0.797844
All	0.03	1	0	1	0	0.79576
All	0.04	1	0	1	0	0.793632
All	0.05	1	0	1	0	0.79146
All	0.06	1	0	1	0	0.789241
All	0.07	1	0	1	0	0.786975
All	0.08	1	0	1	0	0.78466
All	0.09	1	0	1	0	0.782293
All	0.1	1	0	1	0	0.779874
All	0.11	1	0	1	0	0.777401
All	0.12	1	0	1	0	0.774871
All	0.13	1	0	1	0	0.772284
All	0.14	1	0	1	0	0.769636
All	0.15	1	0	1	0	0.766926
All	0.16	1	0	1	0	0.764151
All	0.17	1	0	1	0	0.761309
All	0.18	1	0	1	0	0.758399
All	0.19	1	0	1	0	0.755416
All	0.2	1	0	1	0	0.752358
All	0.21	1	0	1	0	0.749224
All	0.22	1	0	1	0	0.746009
All	0.23	1	0	1	0	0.74271
All	0.24	1	0	1	0	0.739325
All	0.25	1	0	1	0	0.735849
All	0.26	1	0	1	0	0.732279
All	0.27	1	0	1	0	0.728612
All	0.28	1	0	1	0	0.724843
All	0.29	1	0	1	0	0.720967
All	0.3	1	0	1	0	0.716981
All	0.31	1	0	1	0	0.712879
All	0.32	1	0	1	0	0.708657
All	0.33	1	0	1	0	0.704309
All	0.34	1	0	1	0	0.699828
All	0.35	1	0	1	0	0.69521
All	0.36	1	0	1	0	0.690448
All	0.37	1	0	1	0	0.685535
All	0.38	1	0	1	0	0.680463
All	0.39	1	0	1	0	0.675224
All	0.4	1	0	1	0	0.669811
All	0.41	1	0	1	0	0.664215
All	0.42	1	0	1	0	0.658426
All	0.43	1	0	1	0	0.652433
All	0.44	1	0	1	0	0.646226
All	0.45	1	0	1	0	0.639794
All	0.46	1	0	1	0	0.633124
All	0.47	1	0	1	0	0.626201
All	0.48	1	0	1	0	0.619013
All	0.49	1	0	1	0	0.611543
All	0.5	1	0	1	0	0.603774
All	0.51	1	0	1	0	0.595687
All	0.52	1	0	1	0	0.587264
All	0.53	1	0	1	0	0.578483
All	0.54	1	0	1	0	0.569319
All	0.55	1	0	1	0	0.559748
All	0.56	1	0	1	0	0.549743
All	0.57	1	0	1	0	0.539272
All	0.58	1	0	1	0	0.528302
All	0.59	1	0	1	0	0.516797
All	0.6	1	0	1	0	0.504717
All	0.61	1	0	1	0	0.492017
All	0.62	1	0	1	0	0.478649
All	0.63	1	0	1	0	0.464559
All	0.64	1	0	1	0	0.449686
All	0.65	1	0	1	0	0.433962
All	0.66	1	0	1	0	0.417314
All	0.67	1	0	1	0	0.399657
All	0.68	1	0	1	0	0.380896
All	0.69	1	0	1	0	0.360925
All	0.7	1	0	1	0	0.339623
All	0.71	1	0	1	0	0.316851
All	0.72	1	0	1	0	0.292453
All	0.73	1	0	1	0	0.266247
All	0.74	1	0	1	0	0.238026
All	0.75	1	0	1	0	0.207547
All	0.76	1	0	1	0	0.174528
All	0.77	1	0	1	0	0.138638
All	0.78	1	0	1	0	0.0994854
All	0.79	1	0	1	0	0.0566038
All	0.8	1	0	1	0	0.00943396
All	0.81	1	0	1	0	-0.0427011
All	0.82	1	0	1	0	-0.100629
All	0.83	1	0	1	0	-0.165372
All	0.84	1	0	1	0	-0.238208
All	0.85	1	0	1	0	-0.320755
All	0.86	1	0	1	0	-0.415094
All	0.87	1	0	1	0	-0.523948
All	0.88	1	0	1	0	-0.650943
All	0.89	1	0	1	0	-0.801029
All	0.9	1	0	1	0	-0.981132
All	0.91	1	0	1	0	-1.20126
All	0.92	1	0	1	0	-1.47642
All	0.93	1	0	1	0	-1.83019
All	0.94	1	0	1	0	-2.30189
All	0.95	1	0	1	0	-2.96226
All	0.96	1	0	1	0	-3.95283
All	0.97	1	0	1	0	-5.60377
All	0.98	1	0	1	0	-8.90566
All	0.99	1	0	1	0	-18.8113
All	1	0	0	0	0	#NUM!
None	0	0	0	0	0	0
None	0.01	0	1	0	1	0
None	0.02	0	1	0	1	0
None	0.03	0	1	0	1	0
None	0.04	0	1	0	1	0
None	0.05	0	1	0	1	0
None	0.06	0	1	0	1	0
None	0.07	0	1	0	1	0
None	0.08	0	1	0	1	0
None	0.09	0	1	0	1	0
None	0.1	0	1	0	1	0
None	0.11	0	1	0	1	0
None	0.12	0	1	0	1	0
None	0.13	0	1	0	1	0
None	0.14	0	1	0	1	0
None	0.15	0	1	0	1	0
None	0.16	0	1	0	1	0
None	0.17	0	1	0	1	0
None	0.18	0	1	0	1	0
None	0.19	0	1	0	1	0
None	0.2	0	1	0	1	0
None	0.21	0	1	0	1	0
None	0.22	0	1	0	1	0
None	0.23	0	1	0	1	0
None	0.24	0	1	0	1	0
None	0.25	0	1	0	1	0
None	0.26	0	1	0	1	0
None	0.27	0	1	0	1	0
None	0.28	0	1	0	1	0
None	0.29	0	1	0	1	0
None	0.3	0	1	0	1	0
None	0.31	0	1	0	1	0
None	0.32	0	1	0	1	0
None	0.33	0	1	0	1	0
None	0.34	0	1	0	1	0
None	0.35	0	1	0	1	0
None	0.36	0	1	0	1	0
None	0.37	0	1	0	1	0
None	0.38	0	1	0	1	0
None	0.39	0	1	0	1	0
None	0.4	0	1	0	1	0
None	0.41	0	1	0	1	0
None	0.42	0	1	0	1	0
None	0.43	0	1	0	1	0
None	0.44	0	1	0	1	0
None	0.45	0	1	0	1	0
None	0.46	0	1	0	1	0
None	0.47	0	1	0	1	0
None	0.48	0	1	0	1	0
None	0.49	0	1	0	1	0
None	0.5	0	1	0	1	0
None	0.51	0	1	0	1	0
None	0.52	0	1	0	1	0
None	0.53	0	1	0	1	0
None	0.54	0	1	0	1	0
None	0.55	0	1	0	1	0
None	0.56	0	1	0	1	0
None	0.57	0	1	0	1	0
None	0.58	0	1	0	1	0
None	0.59	0	1	0	1	0
None	0.6	0	1	0	1	0
None	0.61	0	1	0	1	0
None	0.62	0	1	0	1	0
None	0.63	0	1	0	1	0
None	0.64	0	1	0	1	0
None	0.65	0	1	0	1	0
None	0.66	0	1	0	1	0
None	0.67	0	1	0	1	0
None	0.68	0	1	0	1	0
None	0.69	0	1	0	1	0
None	0.7	0	1	0	1	0
None	0.71	0	1	0	1	0
None	0.72	0	1	0	1	0
None	0.73	0	1	0	1	0
None	0.74	0	1	0	1	0
None	0.75	0	1	0	1	0
None	0.76	0	1	0	1	0
None	0.77	0	1	0	1	0
None	0.78	0	1	0	1	0
None	0.79	0	1	0	1	0
None	0.8	0	1	0	1	0
None	0.81	0	1	0	1	0
None	0.82	0	1	0	1	0
None	0.83	0	1	0	1	0
None	0.84	0	1	0	1	0
None	0.85	0	1	0	1	0
None	0.86	0	1	0	1	0
None	0.87	0	1	0	1	0
None	0.88	0	1	0	1	0
None	0.89	0	1	0	1	0
None	0.9	0	1	0	1	0
None	0.91	0	1	0	1	0
None	0.92	0	1	0	1	0
None	0.93	0	1	0	1	0
None	0.94	0	1	0	1	0
None	0.95	0	1	0	1	0
None	0.96	0	1	0	1	0
None	0.97	0	1	0	1	0
None	0.98	0	1	0	1	0
None	0.99	0	1	0	1	0
None	1	0	1	0	1	#NUM!
